# Supplementary material
Source: HighWire-hosted journal article supplement (http://www.qdcxjkg.com/highwire/filestream/113935/field_highwire_adjunct_files/0/ERJ-01047-2013_Disclosures.pdf)
Supplement: ERJ-01047-2013_Disclosures.pdf [file ERJ-01047-2013_Disclosures.pdf]

**N. Kamel** is an employee of the European Respiratory Society.

**C. Pannetier** is an employee of the European Respiratory Society.

**J. Ricou Yanmaz** is an employee of the European Respiratory Society.

**C. Schaffter** is an employee of the European Respiratory Society.
